# Supplementary material for: Photostable near-infrared-absorbing diradical-platinum(ii) complex solubilized by albumin toward a cancer photothermal therapy agent
Source: Royal Society of Chemistry journal article supplement (doi:10.1039/d0ra00652a), 2020-01-01
Supplement: d0ra00652a1.pdf [file d0ra00652a1.pdf]

## Electronic Supplementary information

# **Photostable Near-infrared-Absorbing Diradical-platinum(II) Complex Solubilized by Albumin toward a Cancer Photothermal Therapy Agent**

Ryota Sawamura, Masataka Sato, Atsuko Masuya-Suzuki and Nobuhiko Iki\*

Graduate School of Environmental Studies, Tohoku University, 6-6-07, Aramaki-Aoba,  
Aoba-ku, Sendai, 980-8579, Japan. Email: iki@tohoku.ac.jp

## Experimental

### Reagents and Materials

Potassium tetrachloroplatinate(II) ( $K_2PtCl_4$ ), hydrochloric acid (HCl), nitric acid ( $HNO_3$ ), *N,N*-dimethylformamide (DMF) and dimethyl sulfoxide (DMSO) were purchased from Kanto Chemical Co., Inc. (Tokyo, Japan). 3,5-Dibromo-1,2-phenylenediamine monohydrochloride ( $H_2L \cdot HCl$ ) and indocyanine green (ICG) was supplied from Tokyo Chemical Industry Co., Ltd. Bovine serum albumin (BSA) and Rhodamine 123 were purchased from Sigma-Aldrich. Cell culture reagents (RPMI 1640 medium, fetal bovine serum (FBS), penicillin/streptomycin (PS), and Trypsin/ethylenediaminetetraacetic acid (trypsin/EDTA)) and CellLight™ ER-GFP were purchased from Invitrogen. Hydrogen peroxide ( $H_2O_2$ ), Hoechst 33342, Calcein AM and propidium iodide (PI) were purchased from FUJIFILM Wako Pure Chemical Corporation (Osaka, Japan). All reagents and materials were used without further purification. Samples of MCF-7 cells were obtained from Cell Resource Center for Biomedical Research, Institute of Development, Aging and Cancer, Tohoku University (Seiryomachi 4-1, Sendai, Miyagi 980-8575, Japan).

### Instruments

$^1H$  NMR spectrum was measured with a Bruker DPX400 spectrometer. CHN elemental analysis was performed by using an elemental analyzer JM-11 (J-SCIENCE LAB Co., Ltd.). Inductively Coupled Plasma Atomic Emission Spectroscopy (ICP-AES) measurement was performed by Thermo iCAP 6500 Spectrometer. Absorption spectra were measured using a Shimadzu UV-1800 UV-Vis spectrometer. Hyperspectral images were taken by hyperspectral camera NH-1TIK (EBA JAPAN Co., Ltd.) attached to OLYMPUS polarization microscope BX51 with liquid immersion objective lens (40 x). Fluorescence images were taken by inverted microscope DMi 8 (Leica Microsystems).

Particle size distribution was measured by dynamic light scattering (DLS) using a nanopartica SZ-100 instrument (HORIBA, Ltd.).

### Synthesis of PtL<sub>2</sub>

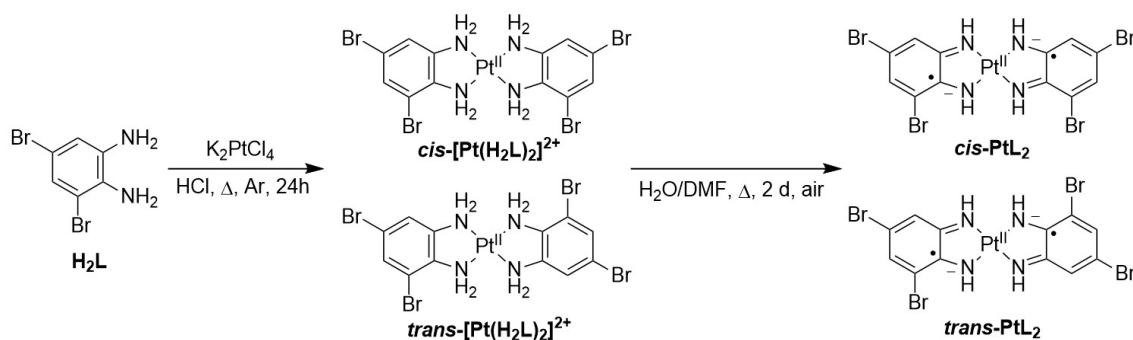

**Scheme S1** Reaction scheme of PtL<sub>2</sub>.

The complex PtL<sub>2</sub> was synthesized based on the reported method.[1] The HCl solution (0.01 M, 9 mL) of K<sub>2</sub>PtCl<sub>4</sub> (0.031 g, 0.075 mmol) and H<sub>2</sub>L · HCl (0.046 g, 0.150 mmol) was refluxed with stirring at 70 °C for 24 h under Ar atmosphere. Water/DMF (1:1 v/v, 18 mL) was then added and the mixture was filtered. The obtained filtrate was heated with shielding light at 50 °C for 2 days. The blue-violet precipitates were collected by filtration, washed with water/DMF (1:2, 1:1 v/v) and water, and dried in vacuo (0.023 g, yield 43%). The complex PtL<sub>2</sub> was used as the mixture of *cis* and *trans* isomers. <sup>1</sup>H NMR (400 MHz, DMSO-*d*<sub>6</sub>): δ 7.21/7.22 (dd, *J*<sub>1</sub> = 1.60/2.00 Hz, *J*<sub>2</sub> = 4.40/4.80 Hz, 1H, ArH), 7.42 (br, 1H, ArH). C<sub>12</sub>H<sub>8</sub>N<sub>4</sub>Br<sub>4</sub>Pt (722.92): calcd. C 19.94, H 1.12, N 7.75; found C 20.02, H 1.25, N 7.66.

### **Solubilization of PtL<sub>2</sub> by bovine serum albumin (BSA)**

The BSA solution in PBS (1 mM, 2 mL) and PtL<sub>2</sub> in DMSO (1 mM) were mixed and the volume was filled up to 20 mL by PBS. The mixture solution was warmed at 37 °C overnight and then filtered using a hydrophilic polytetrafluoroethylene (PTFE) membrane to remove precipitates. The collected filtrate was put in a centrifugal concentration tube Vivaspin Turbo 15 (polyethersulfone (PES) membrane, MWCO 30 kDa) and centrifuged at 3260 xg for 24.5 min. The obtained concentrate was resuspended in PBS (15 mL) and centrifuged again at the same condition. After that, the concentrate was collected as PtL<sub>2</sub> solution solubilized in PBS.

The concentration of PtL<sub>2</sub> was determined by ICP-AES. The PtL<sub>2</sub> solution solubilized in PBS (100 µL) was heated with 69% HNO<sub>3</sub> (1 mL) and 30% H<sub>2</sub>O<sub>2</sub> (1 mL) at 95 °C overnight and completely dried. The obtained dry matter was dissolved in 0.1 M HNO<sub>3</sub> (20 mL) and subjected to ICP measurement.

### **Temperature measurement of solution during NIR laser irradiation**

The measurement system was set up according to the previously reported method.[2] Solubilized PtL<sub>2</sub> in PBS (0–40 µM, 2 mL) was put in the 1-cm quartz cuvette. The solution was stirred at 300 rpm. The bottom of the cuvette was set about 5 cm above the magnetic stirrer. After the solution temperature became stable, the solution was irradiated by 730 nm laser (0.39 W, spot size: 5 mm) for 30 min. The thermocouple was set so as not to interfere with the laser beam. The entire system was shielded from ambient light.

## Cell culture

Human breast cancer cell line MCF-7 was cultured in RPMI 1640 medium supplemented with 10% FBS and 1% PS at 37 °C under the humidified atmosphere of 5% CO<sub>2</sub>. Cells were passed by splitting with trypsin/EDTA when they are 70–80% confluent.

## Hyperspectral imaging of MCF-7 cells containing the complex

MCF-7 cells ( $2 \times 10^4$  cells cm<sup>-2</sup>) were preincubated in a  $\phi 35$  mm culture dish at 37 °C for 24 h. The cells were then incubated in the culture medium supplemented with solubilized PtL<sub>2</sub> (20  $\mu$ M) at 37 °C for 2 h. After rinsing with PBS two times, the cells were observed using the microscope with the hyperspectral camera.

The hyperspectral camera NH-1TIK is able to take the image ( $640 \times 480$  pixels) having the spectral information (400–1000 nm). Taken images consist of 121 (the number of bands) “sub-images”. The pseudo color image was constructed from three sub-images at 480, 545 and 700 nm.

The absorption spectrum of the region of interest (ROI) was obtained by plotting the absorbance ( $A_\lambda$ ) in ROI against the wavelength  $\lambda$ . The  $A_\lambda$  value was calculated by the following equation,

$$A_\lambda = -\log_{10} \frac{I(\lambda)}{I_{BG}(\lambda)} \quad (1)$$

where  $I(\lambda)$ ,  $I_{BG}(\lambda)$  represent the average of transmitted light intensity in ROI and background at the wavelength  $\lambda$ . The background is the region where the cells do not exist.

The distribution map of the solubilized complex was analyzed by using spectral angle mapper (SAM) algorithm.[3] This algorithm measures the spectral similarity between the absorption spectrum in each pixel and the reference absorption spectrum.

### **Mitochondria/nuclei staining of cells containing solubilized PtL<sub>2</sub>**

MCF-7 cells ( $2 \times 10^4$  cells  $\text{cm}^{-2}$ ) were preincubated in a  $\phi 35$  mm dish for 24 h. Before the introduction of solubilized PtL<sub>2</sub>, the mitochondria of cells were stained by Rhodamine 123 (5  $\mu\text{M}$ ) for 30 min. The cells were then treated with the solubilized complex (20  $\mu\text{M}$ ) for 2 h. Finally, the nuclei of cells were stained by Hoechst 33342 (5  $\mu\text{g mL}^{-1}$ ) for 5 min with light-shielding. After rinsing with PBS three times, the cells were observed using the microscope with the hyperspectral camera. The distribution of each agent was analyzed by using SAM algorithm. Merging and coloring were performed by open-source ImageJ software.[4]

### **Endoplasmic reticulum/nuclei staining of cells containing solubilized PtL<sub>2</sub>**

First, CellLight™ ER-GFP (30 Baculovirus-particles  $\text{cell}^{-1}$ ) was transduced into MCF-7 cells ( $1 \times 10^5$  cells) in a  $\phi 35$  mm dish for 24 h. The cells were treated with solubilized PtL<sub>2</sub> (20  $\mu\text{M}$ ) for 2 h. Finally, the nuclei of cells were stained by Hoechst 33342 (5  $\mu\text{g mL}^{-1}$ ) for 5 min with light-shielding. After rinsing with PBS three times, the cells were observed using the microscope with the hyperspectral camera. The distribution of each agent was analyzed by using SAM algorithm. Merging and coloring were performed by open-source ImageJ software.[4]

### **Cytotoxicity measurement**

MCF-7 cells (5000 cells  $\text{well}^{-1}$ ) were seeded in a 96-well culture plate and preincubated for 24 h. After PBS rinsing, the cells were treated with solubilized PtL<sub>2</sub> at different concentrations (0, 2.5, 5.0, 10, 20, 40  $\mu\text{M}$ ) for 24 h. The cells were then stained by Calcein AM at 37 °C for 30 min. Fluorescence intensity at 525 nm of Calcein AM (Ex: 485 nm) in each well was then measured by microplate reader Gemini XPS (Molecular Devices LLC.). Each group was measured in triplicate and the same experiment was performed three times.

### **Cell-killing by photothermal effect of the complex**

The MCF-7 cells ( $2 \times 10^4$  cells  $\text{cm}^{-2}$ ) were incubated in a  $\phi 35$  mm culture dish for 1 d. After PBS rinsing, the culture medium containing PtL<sub>2</sub> (20  $\mu\text{M}$ ) was added to the dish and the cells were cultured at 37 °C for 2 h. The medium was then taken placed at PBS. The culture dish was put in a covering type incubator shielded light. The center of the dish was irradiated by 730 nm laser (0.28 W, spot size: 1 mm) at 37 °C for 15 min. The irradiated cells were co-stained by Calcein AM/PI at 37 °C for 30 min. After that, the cells were observed by a fluorescence microscope.

## Additional graphs and table

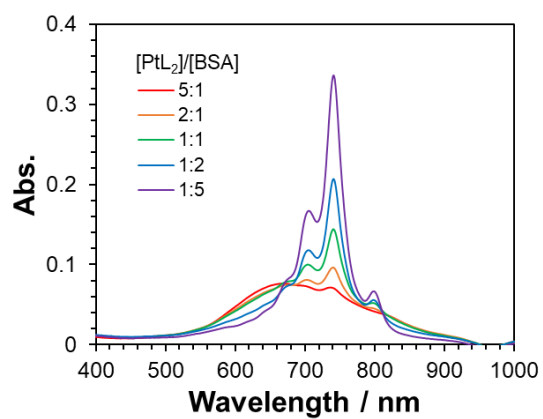

**Fig. S1** Absorption spectra of the mixture of PtL<sub>2</sub> in DMSO and BSA in PBS at different PtL<sub>2</sub>/BSA molar ratio (5:1, 2:1, 1:1, 1:2, and 1:5) after heating at 37 °C for 24 h. [PtL<sub>2</sub>] = 5.0 μM, [BSA] = 1.0, 2.5, 5.0, 10, and 25 μM. DMSO: 0.5 vol%.



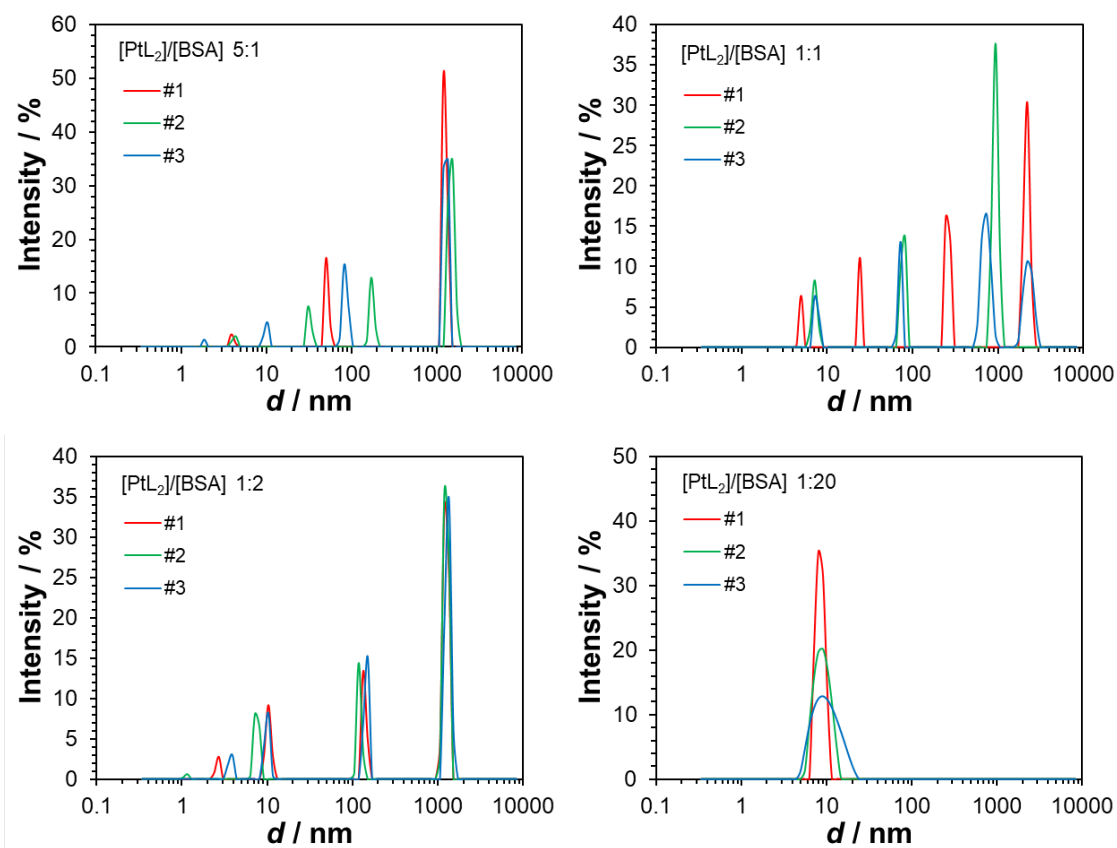

**Fig. S2** DLS size distribution of the mixture of PtL<sub>2</sub> in DMSO and BSA in PBS at different PtL<sub>2</sub>/BSA molar ratio (5:1, 1:1, 1:2, and 1:20) after heating at 37 °C for 24 h. [PtL<sub>2</sub>] = 10 μM, [BSA] = 2.0, 10, 20, 200 μM. DMSO: 0.5 vol%.

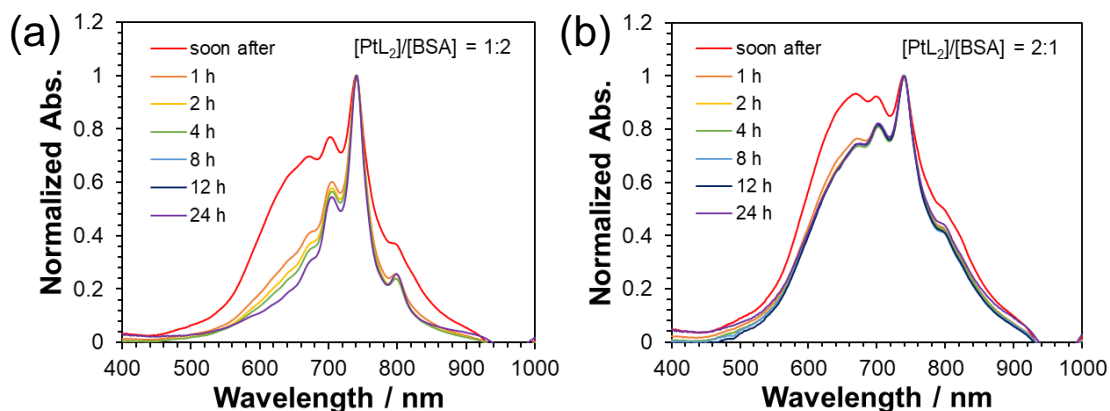

**Fig. S3** The temporal change of absorption spectrum of the mixture of PtL<sub>2</sub> in DMSO and BSA in PBS by heating at 37 °C overnight. (a) [PtL<sub>2</sub>] = 5.0 μM, [BSA] = 10 μM. DMSO: 0.5 vol%. (b) [PtL<sub>2</sub>] = 5.0 μM, [BSA] = 2.5 μM. Spectra were normalized at 740 nm.

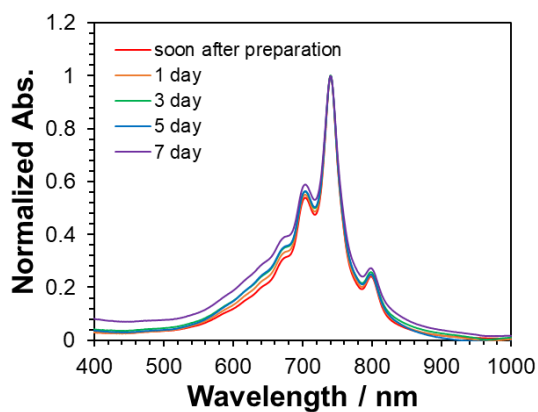

**Fig. S4** The temporal change of absorption spectra of PtL<sub>2</sub> solubilized in PBS (5.0 μM) for a week. Spectra were normalized at 740 nm.

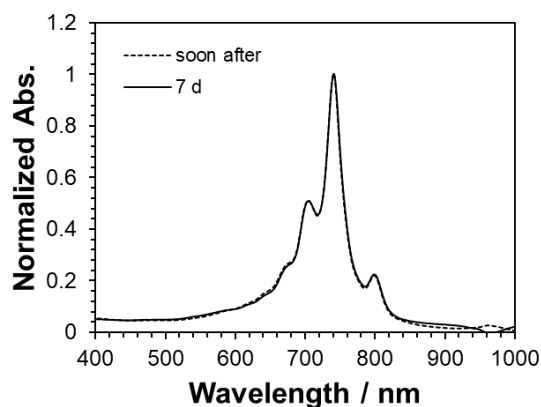

**Fig. S5** Absorption spectra of the stock solution of PtL<sub>2</sub> (4.0 μM) heated at 37 °C for 4 h. Spectra were normalized at 740 nm.

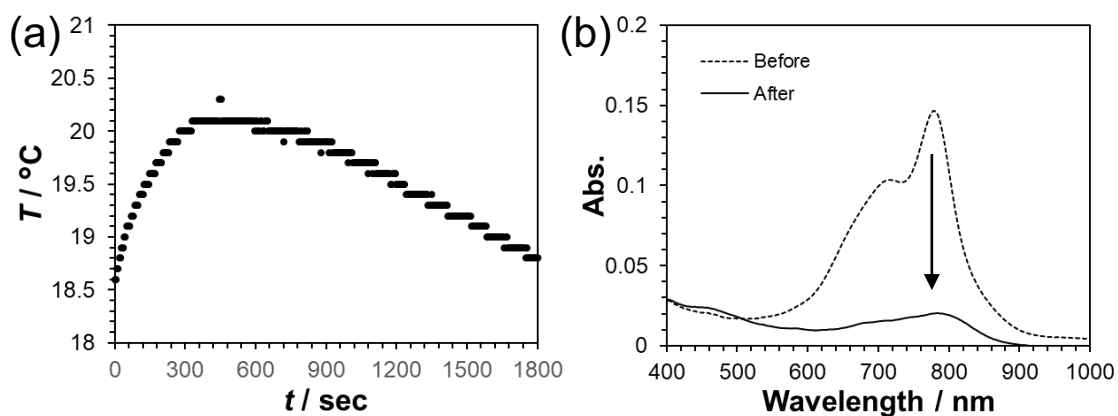

**Fig. S6** (a) Temperature change of ICG in PBS (5.0 μM) under the irradiation by 730 nm laser (2 W cm<sup>-2</sup>) for 30 min. (b) Change of absorption spectra of ICG in PBS (5 μM) by 730 nm laser (2 W cm<sup>-2</sup>) irradiation for 30 min.

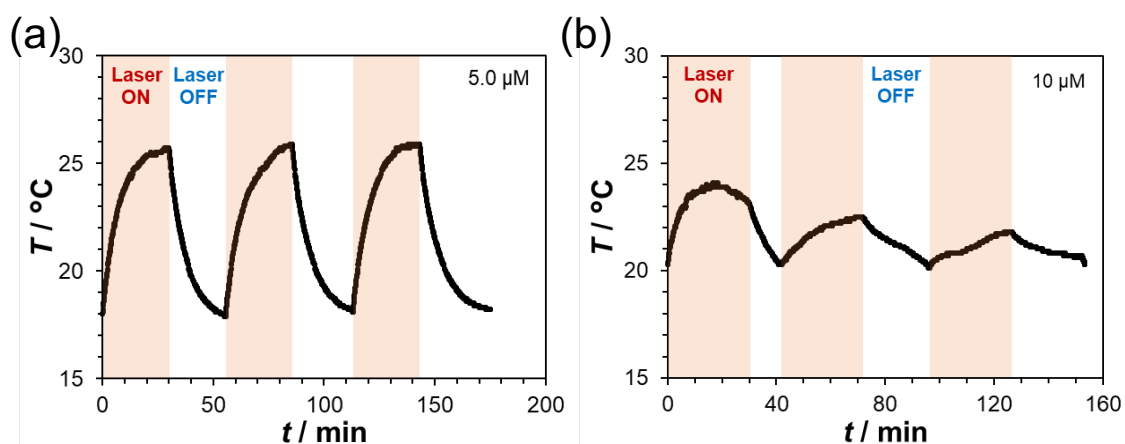

**Fig. S7** Temperature change of (a) solubilized PtL<sub>2</sub> in PBS (5.0 μM) and (b) ICG in PBS (10 μM) over three laser ON/OFF cycles. Each solution was irradiated by 730 nm laser (2 W cm<sup>-2</sup>) for 30 min and then naturally cooled to initial solution temperature by switching off the laser.

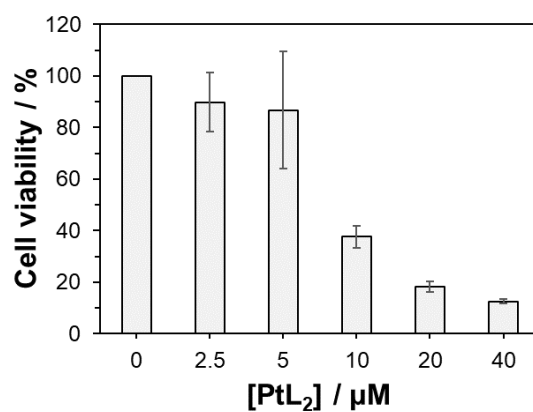

**Fig. S8** The viability of MCF-7 cells treated with different concentrations of solubilized PtL<sub>2</sub> for 24 h. [PtL<sub>2</sub>] = 0, 2.5, 5.0, 10, 20, 40 μM. Error bars represent the standard error ( $n = 3$ ).

**Table S1** Half-inhibitory concentration (IC<sub>50</sub>) values of conventional NIR-absorbing materials and anti-cancer drugs.

| Materials                                   | Cell lines                                    | Incubation time | IC <sub>50</sub> values             | Ref.      |
|---------------------------------------------|-----------------------------------------------|-----------------|-------------------------------------|-----------|
| <b>Solubilized PtL<sub>2</sub></b>          | MCF-7                                         | 24 h            | <b>8.1 μM</b><br><b>(5.9 μg/mL)</b> | This work |
| <b>Conventional NIR-absorbing materials</b> |                                               |                 |                                     |           |
| Indocyanine green (ICG)                     | Human retinal pigment epithelial (HRPE) cells | 24 h            | 0.62 mg/mL                          | [5]       |
| Gold nanoparticles                          | MCF-7                                         | 24 h            | 50 μg/mL                            | [6]       |
| Single-walled carbon nanotubes (SWCNTs)     | Mouse Embryo Fibroblasts (MEF)                | 24 h            | 21.85 μg/mL                         | [7]       |
| <b>Anti-cancer drugs</b>                    |                                               |                 |                                     |           |
| Cisplatin                                   | MCF-7                                         | 24 h            | 5.75 ± 0.02 μM                      | [8]       |
| Doxorubicin                                 | MCF-7                                         | 48 h            | 0.68 ± 0.04 μg/mL                   | [9]       |
| Paclitaxel                                  | MCF-7                                         | 24 h            | 2.5 nM                              | [10]      |

## References

- [1] Y. Konno and N. Matsushita, *Bull. Chem. Soc. Jpn.*, 2006, **79**, 1237.
- [2] H. Chen, L. Shao, T. Ming, Z. Sun, C. Zhao, B. Yang and J. Wang, *Small*, 2010, **6**, 2272.
- [3] X. Liu and C. Yang, *In Proceedings of the IEEE International Congress on Image and Signal Processing (CISP 2013)*, 2013, 814.
- [4] W. S. Rasband, *ImageJ, U.S. National Institutes of Health, Bethesda, Maryland, USA*, <http://imagej.nih.gov/ij/>, 1997–2012.
- [5] S. Hsu, Y. Kao and W. Wu, *J. Ocular Pharmacol. Ther.*, 2004, **20**, 353.
- [6] P. Balashanmugam, P. Durai, M. D. Balakumaran and P. T. Kalaichelvan, *J. Photochem. Photobiol. B*, 2016, **165**, 163.
- [7] H. Yang, D. Yang, H. Zhang, W. Zhang, H. Liu, C. Liu and Z. Xi, *Asian J. Ecotoxicol.*, 2007, **2**, 427. (in Chinese)
- [8] J. O. Suberu, I. Romero-Canelón, N. Sullivan, A. A. Lapkin and G. C. Barker, *ChemMedChem.*, 2014, **9**, 2791.
- [9] X. J. Fang, H. Jiang, Y. Q. Zhu, L. Y. Zhang, Q. H. Fan and Y. Tian, *Oncol. Rep.*, 2014, **31**, 2735.
- [10] J. E. Liebmann, J. A. Cook, C. Lipschultz, D. Teague, J. Fisher and J. B. Mitchell, *Br. J. Cancer*, 1993, **68**, 1104.
